# Supplementary material for: Deep eutectic solvent-based microextraction system for simultaneous lignocellulose fractionation and furfural production
Source: Royal Society of Chemistry journal article supplement (doi:10.1039/d4gc02874k), 2024-11-27
Supplement: d4gc02874k1.pdf [file d4gc02874k1.pdf]

## Supplementary information

### **Deep eutectic solvent-based microextraction system for simultaneous lignocellulose fractionation and furfural production**

Liu Liu, Qianwei Li, Caixia Wan\*

Department of Chemical and Biomedical Engineering, University of Missouri, 1406 Rollins Street,  
Columbia, MO, United States 65211

\* Corresponding author: Tel: +1 573 884 7882, Email: [wanca@missouri.edu](mailto:wanca@missouri.edu)

Numbers of Page: 15

Number of Table: 8

Number of Figure: 3

## Quantitative analysis

Quantitative analysis was performed according to the method described by Wen et al.<sup>1</sup>

$$I_{C9} = I(S_{2/6} + S'_{2/6})/2 + I(G_2) + I(H_{2/6})/2 \quad (S1)$$

where  $I_{C9}$  represents the integral value of aromatic ring in lignin;  $I(S_{2/6} + S'_{2/6})$  is the integration of  $S_{2/6}$  and  $S'_{2/6}$ ;  $I(G_2)$  is the integral value of  $G_2$ ;  $I(H_{2/6})$  is the integral value of  $H_{2,6}$ . The integration was conducted in the same contour level by using MestReNova.

$$I_X\% = I_X/I_{C9} \times 100\% \quad (S2)$$

where  $I_X$  is the integral value of A ( $\beta$ -O-4,  $\beta'$ -O-4), B ( $\beta$ -5), and C ( $\beta$ - $\beta$ ); S/G ratio was calculated with the following equation:

$$S/G \text{ ratio} = I(S_{2/6} + S'_{2/6})/2 / I(G_2) \quad (S3)$$

## Enzymatic hydrolysis

The enzymatic hydrolysis was carried out at 50 °C for 72 h in an incubator shaker. The pretreated solids (2 g) were added to 20 mL of citric acid buffer (50 mM, pH 5.5) and  $\text{NaN}_3$  was then added to the mixture.

The enzyme loading was 5 mg protein/g solid, with Cellic<sup>®</sup> CTec2 and HTec2 added at 10:1 volumetric mixing ratio. After the hydrolysis, the enzymes were deactivated by heating the mixture at 80 °C. The liquid was collected for sugar analysis using high performance liquid chromatograph (HPLC). Glucose yields were calculated according to Equation S4.

$$\text{Glucose yield (\%)} = \frac{\text{Mass of glucose released after hydrolysis}}{\text{Mass of cellulose in pulp}} \times 0.9 \times 100\% \quad (S4)$$

**Table S1.** Composition of biphasic solvent systems

| Sample No.                      | Aqueous phase (wt%) |               |      |                  | Organic phase (wt%) |      |
|---------------------------------|---------------------|---------------|------|------------------|---------------------|------|
|                                 | DES<br>(PEG:OA)     | NaCl solution |      |                  | H <sub>2</sub> O    | MIBK |
|                                 |                     | Total         | NaCl | H <sub>2</sub> O |                     |      |
| D <sub>70</sub>                 | 70.0                | -             | -    | -                | -                   | 30.0 |
| D <sub>63</sub> W <sub>7</sub>  | 63.0                | -             | -    | -                | 7.0                 | 30.0 |
| D <sub>49</sub> W <sub>21</sub> | 49.0                | -             | -    | -                | 21.0                | 30.0 |
| D <sub>35</sub> W <sub>35</sub> | 35.0                | -             | -    | -                | 35.0                | 30.0 |
| D <sub>56</sub> S <sub>14</sub> | 56.0                | 14.0          | 3.5  | 10.5             | -                   | 30.0 |
| D <sub>49</sub> S <sub>21</sub> | 49.0                | 21.0          | 5.3  | 15.7             | -                   | 30.0 |
| D <sub>42</sub> S <sub>28</sub> | 42.0                | 28.0          | 7.0  | 21.0             | -                   | 30.0 |
| D <sub>35</sub> S <sub>35</sub> | 35.0                | 35.0          | 8.8  | 26.2             | -                   | 30.0 |
| D <sub>28</sub> S <sub>42</sub> | 28.0                | 42.0          | 10.5 | 31.4             | -                   | 30.0 |
| D <sub>21</sub> S <sub>49</sub> | 21.0                | 49.0          | 12.3 | 36.7             | -                   | 30.0 |
| D <sub>14</sub> S <sub>56</sub> | 14.0                | 56.0          | 14.0 | 41.9             | -                   | 30.0 |

**Table S2.** Thermal behavior of DES with PEG mole fraction ( $\chi_{\text{PEG}}$ ) varied from 0.1 to 1

| $\chi_{\text{PEG}}$ | Melting point ( $T_m$ , °C) | Melting enthalpy ( $\Delta H_m$ , J/g) |
|---------------------|-----------------------------|----------------------------------------|
| 0.1                 | 97.16                       | 565.5                                  |
| 0.3                 | 25.90                       | 38.2                                   |
| 0.5                 | -63.94                      | 5.0                                    |
| 0.7                 | -22.09                      | 38.8                                   |
| 0.9                 | -13.11                      | 105.7                                  |
| 1.0                 | -10.37                      | 131.2                                  |

**Table S3.** Viscosity of DES

| <b>Sample <sup>a</sup></b> | <b>Viscosity [mPa·s]<sup>b</sup></b> |
|----------------------------|--------------------------------------|
| PEG 400                    | 63.03                                |
| DES +0%H <sub>2</sub> O    | 215.17                               |
| DES+10%H <sub>2</sub> O    | 107.95                               |
| DES+20%H <sub>2</sub> O    | 28.45                                |
| DES+40%H <sub>2</sub> O    | 33.38                                |

<sup>a</sup> In DES, molar ratio of PEG and OA was 1:1.

<sup>b</sup> Viscosity measured at room temperature.

**Table S4.** Xylose conversion under different reaction conditions

| Sample No. of biphasic solvent  | Reaction condition |            | Xylose conversion |
|---------------------------------|--------------------|------------|-------------------|
|                                 | Temperature (°C)   | Time (min) | (mol%)            |
| D <sub>56</sub> S <sub>14</sub> | 150                | 60         | 93.75±0.44        |
| D <sub>49</sub> S <sub>21</sub> | 150                | 60         | 97.33±0.33        |
| D <sub>42</sub> S <sub>28</sub> | 150                | 60         | 96.76±0.81        |
| D <sub>35</sub> S <sub>35</sub> | 150                | 60         | 98.23±1.10        |
| D <sub>28</sub> S <sub>42</sub> | 150                | 60         | 97.54±1.03        |
| D <sub>21</sub> S <sub>49</sub> | 150                | 60         | 94.19±0.77        |
| D <sub>14</sub> S <sub>56</sub> | 150                | 60         | 88.01±1.10        |
| D <sub>42</sub> S <sub>28</sub> | 160                | 60         | 99.92±0.06        |
| D <sub>42</sub> S <sub>28</sub> | 140                | 60         | 74.93±2.36        |
| D <sub>42</sub> S <sub>28</sub> | 130                | 60         | 50.46±0.01        |
| D <sub>42</sub> S <sub>28</sub> | 150                | 20         | 66.45±3.64        |
| D <sub>42</sub> S <sub>28</sub> | 150                | 40         | 92.20±2.62        |
| D <sub>42</sub> S <sub>28</sub> | 150                | 80         | 99.93±0.05        |
| D <sub>42</sub> S <sub>28</sub> | 150                | 100        | 100.00±0.01       |

**Table S5.** Structural characteristics of lignin by 2D HSQC NMR

| <b>Lignin type</b> | <b>Lignin interlinkage abundance (%) *</b> |            |                   | <b>S/G ratio</b> |
|--------------------|--------------------------------------------|------------|-------------------|------------------|
|                    | $\beta$ -O-4                               | $\beta$ -5 | $\beta$ - $\beta$ |                  |
| PEG-g-lignin       | 18.25                                      | 0.37       | 2.44              | 1.47             |

\* Data expressed as per 100 Ar.

**Table S6.** NaCl effect on acidity of DES (PEG:OA)

| No. | DES (wt%) | 25%NaCl solution (wt%) | H <sub>2</sub> O (wt%) | pH   | mV  |
|-----|-----------|------------------------|------------------------|------|-----|
| 1   | 80        | 20                     | -                      | 0.68 | 368 |
| 2   | 60        | 40                     | -                      | 0.45 | 381 |
| 3   | 40        | 60                     | -                      | 0.30 | 390 |
| 4   | 20        | 80                     | -                      | 0.16 | 397 |
| 5   | 80        | -                      | 20                     | 1.48 | 324 |
| 6   | 60        | -                      | 40                     | 1.44 | 326 |
| 7   | 40        | -                      | 60                     | 1.45 | 325 |
| 8   | 20        | -                      | 80                     | 1.60 | 317 |
| 9   | 100       | 0                      | -                      | 1.19 | 340 |
| 10  | 0         | 100                    | -                      | 6.52 | 43  |



**Table S7.** Comparison of furfural production via biphasic systems\*

| <b>Feedstock</b>         | <b>Biphasic system</b>          | <b>Catalyst</b>                                                                 | <b>Temperature (°C)</b> | <b>Duration (min)</b> | <b>Furfural yield (%)</b> | <b>Ref.</b> |
|--------------------------|---------------------------------|---------------------------------------------------------------------------------|-------------------------|-----------------------|---------------------------|-------------|
| Xylose                   | SBP/H <sub>2</sub> O            | -                                                                               | 190                     | 180                   | 59                        | 2           |
| Birch hydrolysate liquor | SBP/H <sub>2</sub> O            | -                                                                               | 190                     | 180                   | 54                        | 3           |
| Xylose                   | EA/ChCl:H <sub>2</sub> O:PTSA   | -                                                                               | 130                     | 15                    | 50                        | 3           |
| Xylose                   | 2-MTHF/NaCl solution            | MC-SnO <sub>x</sub> /NaCl                                                       | 180                     | 20                    | 53.9                      | 4           |
| Xylose                   | MIBK/H <sub>2</sub> O           | AlCl <sub>3</sub> /HCl                                                          | 160                     | 12                    | 90                        | 5           |
| Xylose                   | Toluene/H <sub>2</sub> O        | H <sub>2</sub> SO <sub>4</sub>                                                  | 190                     | 2.5                   | 70                        | 6           |
| Xylan                    | GVL/LiCl·3H <sub>2</sub> O      | LiCl·3H <sub>2</sub> O                                                          | 140                     | 120                   | 77.22                     | 7           |
| Corncob                  | Toluene/H <sub>2</sub> O        | CrCl <sub>3</sub> ·6H <sub>2</sub> O/NaCl                                       | 140                     | 60                    | 23.88                     | 8           |
| Corn Stover              | THF/H <sub>2</sub> O            | AlCl <sub>3</sub> ·6H <sub>2</sub> O/NaCl                                       | 160                     | 60                    | 55                        | 9           |
| Switchgrass              | THF/H <sub>2</sub> O            | AlCl <sub>3</sub> ·6H <sub>2</sub> O/NaCl                                       | 160                     | 60                    | 56                        | 10          |
| Pinewood                 | THF/H <sub>2</sub> O            | AlCl <sub>3</sub> ·6H <sub>2</sub> O/NaCl                                       | 160                     | 60                    | 38                        | 10          |
| Poplar                   | THF/H <sub>2</sub> O            | AlCl <sub>3</sub> ·6H <sub>2</sub> O/NaCl                                       | 160                     | 60                    | 64                        | 10          |
| Corn Stalk               | GVL/H <sub>2</sub> O            | [BMIM]Cl/AlCl <sub>3</sub>                                                      | 140                     | 240                   | 47.96                     | 10          |
| Eucalyptus               | 2-MTHF/ChCl:LA                  | Al <sub>2</sub> (SO <sub>4</sub> ) <sub>3</sub> /H <sub>2</sub> SO <sub>4</sub> | 150                     | 30                    | 54.7                      | 11          |
| Bamboo                   | GVL/BDO:ChCl                    | Al <sub>2</sub> (SO <sub>4</sub> ) <sub>3</sub> /H <sub>2</sub> SO <sub>4</sub> | 130                     | 90                    | 53.81                     | 12          |
| Corncob                  | MIBK/FeCl <sub>3</sub> solution | FeCl <sub>3</sub>                                                               | 180                     | 60                    | 73.49                     | 13          |
| Tung hull                | MIBK/FeCl <sub>3</sub> solution | FeCl <sub>3</sub>                                                               | 180                     | 60                    | 69.38                     | 14          |

|                      |                                 |                                                                     |     |    |       |           |
|----------------------|---------------------------------|---------------------------------------------------------------------|-----|----|-------|-----------|
| Tung shell           | MIBK/FeCl <sub>3</sub> solution | FeCl <sub>3</sub>                                                   | 180 | 60 | 99.86 | 14        |
| Miscanthus×giganteus | MIBK/FeCl <sub>3</sub> solution | FeCl <sub>3</sub>                                                   | 180 | 60 | 73.75 | 14        |
| Eucalyptus           | MIBK/FeCl <sub>3</sub> solution | FeCl <sub>3</sub>                                                   | 180 | 60 | 75.18 | 14        |
| Corncob              | Toluene/H <sub>2</sub> O        | H <sub>2</sub> SO <sub>4</sub>                                      | 140 | 10 | 65.67 | 14        |
| Corncob              | DOP/ChCl:OA                     | AlCl <sub>3</sub> ·6H <sub>2</sub> O/H <sub>2</sub> SO <sub>4</sub> | 120 | 30 | 46    | 15        |
| Wheat straw          | THF/NaCl solution               | CrPO <sub>4</sub>                                                   | 180 | 90 | 67    | 16        |
| Switchgrass          | MIBK/PEG:OA                     | NaCl                                                                | 150 | 60 | 76.5  | This work |

\* 2-MTHF: 2-methyltetrahydrofuran; ChCl: Choline chloride; LA: Lactic acid; MIBK: Methyl isobutyl ketone; GVL:  $\gamma$ -valerolactone; BDO: 1,4-butanediol; DOP: Dioctyl phthalate; SBP: 2-sec-butylphenol; PTSA: *p*-toluenesulfonic acid; EA: Ethyl acetate; THF: Tetrahydrofuran toluene.

**Table S8.** Assignments of ATR-FTIR bands for pulp and switchgrass

|             | Wavenumber (cm <sup>-1</sup> ) | Band assignments                                                                                                                                                                                              |
|-------------|--------------------------------|---------------------------------------------------------------------------------------------------------------------------------------------------------------------------------------------------------------|
| Pulp        | 3346                           | $\nu(\text{O-H})$ : cellulose, lignin                                                                                                                                                                         |
|             | 1611, 1514                     | $\nu(\text{C=C})$ : aromatic skeleton stretching of lignin                                                                                                                                                    |
|             | 1313                           | $\delta(\text{CH}_2)$ of crystalline cellulose: wagging; $\delta(\text{CH}_2)$ : rocking                                                                                                                      |
|             | 1164                           | $\nu_{\text{as}}(\text{C-O-C})$ : bridge of $\beta$ -(1-4)-glycosidic in crystalline cellulose; $\nu(\text{C-O})$ of glucopyranose; $\nu(\text{C-O-C})$ of carbohydrate; $\delta(\text{C-H})$ of carbohydrate |
|             | 1104                           | $\nu(\text{C-O})$ : H-OOC- from OA, C-O from PEG                                                                                                                                                              |
|             | 1054                           | $\nu(\text{C-O})$ : primary alcohol of carbohydrate; C-O- ether of cellulose or CH <sub>3</sub> -O in lignin; CH <sub>3</sub> -O- of ester and $\beta$ -O-4 linkages in lignin                                |
|             | 777, 721                       | $\delta_{\text{oop}}$ (O-H) of crystalline cellulose                                                                                                                                                          |
| Switchgrass | 3361                           | $\nu(\text{O-H})$ : cellulose, lignin, hemicellulose                                                                                                                                                          |
|             | 1606, 1514                     | $\nu(\text{C=C})$ : aromatic skeleton stretching of lignin                                                                                                                                                    |
|             | 1318                           | $\delta(\text{CH}_2)$ of crystalline cellulose: wagging; $\delta(\text{CH}_2)$ : rocking                                                                                                                      |
|             | 1164                           | $\nu_{\text{as}}(\text{C-O-C})$ : bridge of $\beta$ -(1-4)-glycosidic in crystalline cellulose; $\nu(\text{C-O})$ of glucopyranose; $\nu(\text{C-O-C})$ of carbohydrate; $\delta(\text{C-H})$ of carbohydrate |
|             | 1069                           | $\nu(\text{C-O})$ : primary alcohol of carbohydrate; C-O- ether of cellulose or CH <sub>3</sub> -O in lignin; CH <sub>3</sub> -O- of ester and $\beta$ -O-4 linkages in lignin                                |
|             | 986                            | $\delta_{\text{oop}}$ (C-H): Deformation in lignin                                                                                                                                                            |

\*  $\nu$ : stretching vibration;  $\nu_{\text{as}}$ : asymmetric stretching vibration;  $\delta$ : in plane deformation;  $\delta_{\text{oop}}$ : out-of-plane bending vibration

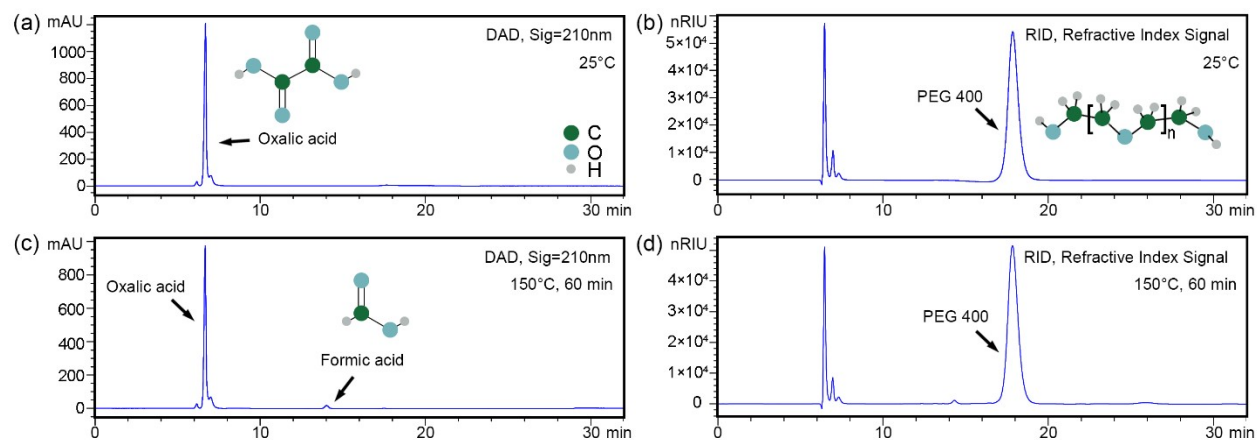

**Figure S1.** HPLC chromatograms of the DES from D<sub>42</sub>S<sub>28</sub> before (a, b) and after (c, d) heating at 150 °C for 60 min.

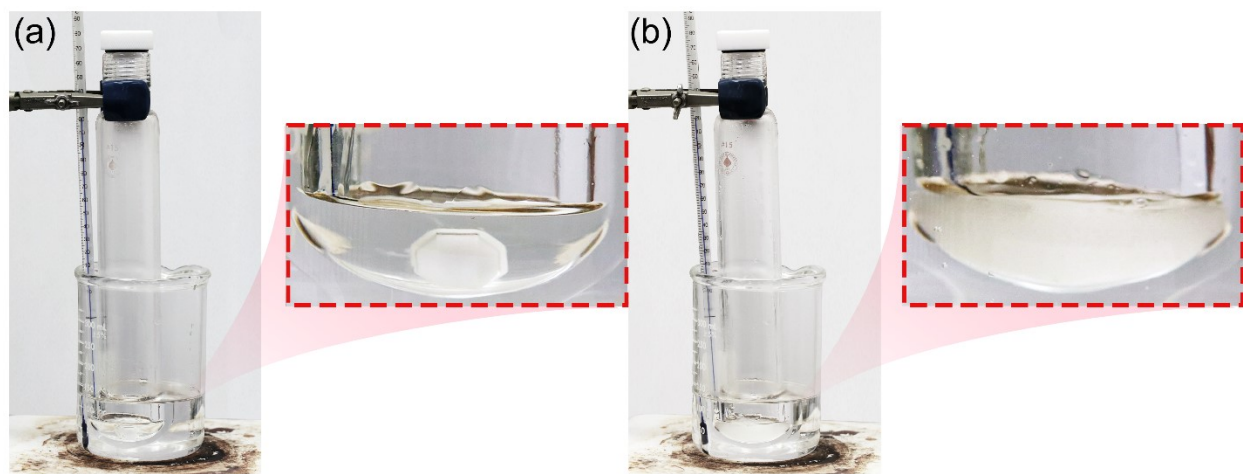

**Figure S2.** DES-based biphasic solvent at heating around 120 °C without (a) and with (b) NaCl solution. (120°C is the maximum limit of the pressure tube. These pictures are used to show the mixture state under heating and stirring.)

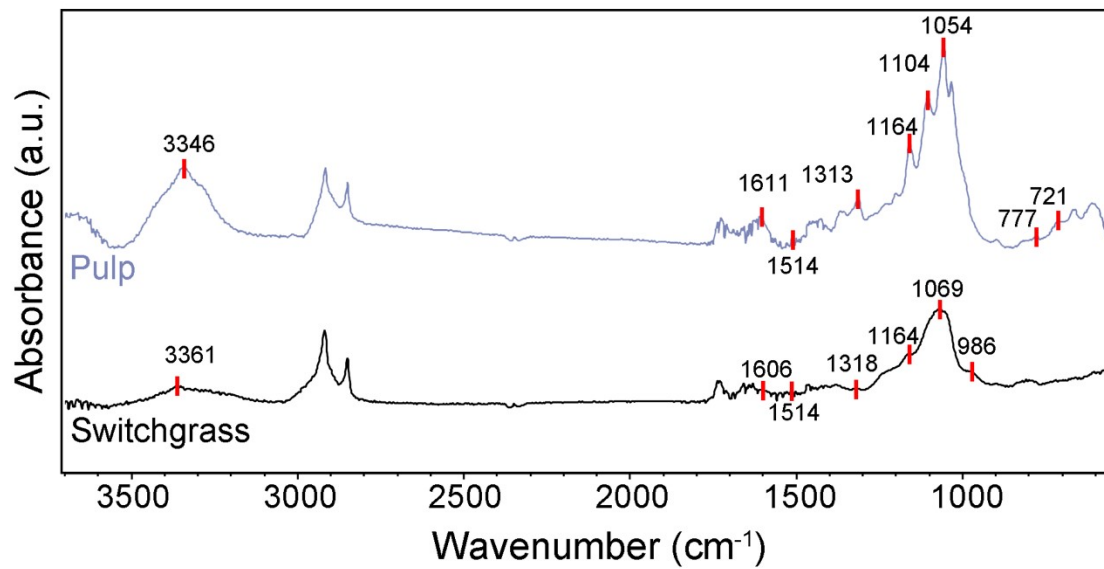

**Figure S3.** FTIR spectra of pulp (from D<sub>42</sub>S<sub>28</sub>) and switchgrass (assignments of bands in Table S8).

## Reference

1. J.-L. Wen, B.-L. Xue, F. Xu and R.-C. Sun, *BioEnergy Research*, 2012, **5**, 886-903.
2. G. Gómez Millán, R. P. Bangalore Ashok, P. Oinas, J. Llorca and H. Sixta, *Biomass Conversion and Biorefinery*, 2021, **11**, 2095-2106.
3. D. M. E. Delgadillo, G. A. D. Castro and S. A. Fernandes, *Reaction Chemistry & Engineering*, 2024.
4. N. Zhou, C. Zhang, Y. Cao, J. Zhan, J. Fan, J. H. Clark and S. Zhang, *Journal of Cleaner Production*, 2021, **311**, 127780.
5. W. Guo, H. C. Bruining, H. J. Heeres and J. Yue, *Green Chemistry*, 2023, **25**, 5878-5898.
6. M. Papaioannou, R. J. T. Kleijwegt, J. van der Schaaf and M. F. Neira d'Angelo, *Industrial & Engineering Chemistry Research*, 2019, **58**, 16106-16115.
7. C. Liu, L. Wei, X. Yin, X. Pan, J. Hu, N. Li, J. Xu, J. Jiang and K. Wang, *Chemical Engineering Journal*, 2021, **425**, 130608.
8. Y. Zhang, M. Chen, J. Wang and Q. Hu, *Asian Journal of Chemistry*, 2014, **26**, 1717.
9. Y. Yang, C. W. Hu and M. M. Abu-Omar, *ChemSusChem*, 2012, **5**, 405-410.
10. S. Wang, Y. Zhao, H. Lin, J. Chen, L. Zhu and Z. Luo, *Green chemistry*, 2017, **19**, 3869-3879.
11. L.-L. Sun, Z. Yue, S.-C. Sun, S.-N. Sun, X.-F. Cao, T.-Q. Yuan and J.-L. Wen, *Bioresource Technology*, 2022, **352**, 127074.
12. J. Cheng, X. Liu, C. Huang, Y. Zhan, C. Huang, T. Chen, X. Meng, C. G. Yoo, G. Fang and A. J. Ragauskas, *Green Chemistry*, 2023, **25**, 6270-6281.
13. Q. Zhang, Z. Guo, X. Zeng, B. Ramarao and F. Xu, *Renewable Energy*, 2021, **179**, 351-358.
14. Q. Wang, W. Qi, W. Wang, Y. Zhang, N. Leksawasdi, X. Zhuang, Q. Yu and Z. Yuan, *Renewable Energy*, 2019, **144**, 139-146.
15. C.-Y. Bu, Y.-X. Yan, L.-H. Zou, S.-P. Ouyang, Z.-J. Zheng and J. Ouyang, *Bioresource Technology*, 2021, **319**, 124156.
16. Z. Cao, Z. Fan, Y. Chen, M. Li, T. Shen, C. Zhu and H. Ying, *Applied Catalysis B: Environmental*, 2019, **244**, 170-177.
